# Supplementary material for: Models of Regional Habitat Quality and Connectivity for Pumas (Puma concolor) in the Southwestern United States
Source: PLoS One. 2013 Dec 18;8(12):e81898. doi: 10.1371/journal.pone.0081898 (PMC3867332; doi:10.1371/journal.pone.0081898)
Supplement: Table S3 — Matrix of effective resistance values for all possible pairs of 67 high quality habitat patches used to estimate connectivity. (XLSX) [file pone.0081898.s004.xlsx]

## Sheet: Sheet1
Table S3. Matrix of effective resistance values for all possible pairs of 67 high quality habitat patches used to estimate connectivity for dispersing pumas in Arizona and New Mexico. All values are multiplied by 1000 to aid interpretation.
Patch ID	1	2	3	4	5	6	9	10	11	12	13	14	15	16	17	24	25	36	61	84	85	89	90	91	92	93	94	95	96	97	98	99	100	101	102	103	104	105	106	107	108	109	110	111	112	113	114	115	116
1		0.151797	0.476786	0.974267	0.989951	0.476186	0.859119	0.849028	1.49849	0.460244	1.10573	0.487015	0.479312	1.23881	0.502916	0.613214	0.527679	0.574579	1.01226	0.957537	0.641461	1.04169	0.839058	1.14032	0.885337	0.774985	1.04812	1.00687	1.19793	0.937679	1.70773	1.60674	1.20775	1.65979	1.50997	1.48244	1.11062	1.1138	1.03994	1.405	1.29514	1.06092	1.40226	1.49114	1.55766	1.50949	1.39407	1.35464	1.2684
2			0.466741	0.656752	0.762323	0.228455	0.61568	0.643954	1.30778	0.330592	0.921332	0.396184	0.289466	1.0442	0.374278	0.509739	0.362187	0.449974	0.82276	0.836404	0.487234	0.851997	0.70798	0.952778	0.747768	0.631365	0.863138	0.825294	1.01243	0.768589	1.52585	1.42535	1.02661	1.47843	1.32854	1.3012	0.965872	0.966086	0.887521	1.2247	1.11524	0.903865	1.2229	1.31172	1.404	1.3303	1.21545	1.17705	1.10756
3				1.04493	0.997963	0.55674	0.88466	0.833607	1.46444	0.435851	1.06298	0.317114	0.487229	1.20998	0.422809	0.421015	0.488898	0.445103	0.976898	0.795583	0.554786	1.00762	0.704554	1.10267	0.761158	0.665474	1.00705	0.960363	1.1573	0.877827	1.66145	1.55974	1.16091	1.61275	1.46305	1.43526	1.00084	1.01033	0.946181	1.35644	1.24605	0.975484	1.35237	1.44131	1.46494	1.4593	1.34302	1.30206	1.18861
4					0.746888	0.61014	0.609935	0.763805	1.48624	0.849016	1.12433	0.895092	0.630104	1.20715	0.837365	0.952827	0.700614	0.860704	1.00799	1.22771	0.796801	1.04276	1.08113	1.1479	1.09874	0.970396	1.06859	1.04035	1.21456	1.04706	1.73865	1.63997	1.24467	1.69319	1.54313	1.51652	1.29678	1.28961	1.19945	1.44351	1.33582	1.20196	1.44534	1.53373	1.70924	1.55312	1.4402	1.40558	1.39112
5						0.656694	0.355557	0.200018	1.08047	0.811474	0.76603	0.828632	0.562822	0.768835	0.775589	0.853099	0.568231	0.749054	0.622874	1.08974	0.579777	0.689712	0.934162	0.789741	0.929347	0.794432	0.72939	0.708248	0.865835	0.833681	1.39966	1.30406	0.921348	1.3576	1.20752	1.18224	1.10857	1.09528	0.995797	1.11511	1.01107	0.983684	1.12346	1.21069	1.49469	1.23121	1.12115	1.09264	1.15223
6							0.504735	0.537034	1.20751	0.320469	0.823952	0.406692	0.081521	0.94224	0.329697	0.491599	0.254075	0.404453	0.722403	0.795508	0.407435	0.750066	0.655168	0.852886	0.688293	0.564587	0.764341	0.729016	0.913767	0.674774	1.42985	1.32962	0.930339	1.38272	1.23276	1.20552	0.899309	0.896433	0.812962	1.12955	1.02025	0.825126	1.12824	1.21706	1.32904	1.2358	1.12131	1.08353	1.02631
9								0.399108	1.16199	0.690754	0.813469	0.719732	0.43441	0.874192	0.662073	0.75723	0.471925	0.656325	0.686709	1.01092	0.540789	0.724392	0.85836	0.832488	0.864917	0.732136	0.759209	0.736224	0.903307	0.783301	1.4336	1.33593	0.942637	1.38924	1.23907	1.21288	1.05367	1.04325	0.947963	1.14183	1.03513	0.94354	1.14571	1.23386	1.45365	1.25369	1.14184	1.10933	1.12452
10									0.74498	0.655228	0.429078	0.657837	0.407219	0.434803	0.609793	0.665992	0.375306	0.55705	0.241301	0.881801	0.314434	0.273582	0.722125	0.403276	0.703359	0.565019	0.365359	0.366621	0.50152	0.586084	1.06838	0.974164	0.584298	1.02767	0.876814	0.851921	0.871169	0.854229	0.749149	0.787613	0.683835	0.727407	0.798326	0.885908	1.24056	0.907389	0.799336	0.774043	0.882003
11										1.29726	0.171237	1.28569	1.06691	0.556588	1.24505	1.27737	1.01791	1.16681	0.555754	1.46695	0.75184	0.881345	1.30558	0.848025	1.26492	1.12684	0.81396	0.690905	0.890003	1.17017	1.23901	1.16265	0.972413	1.2207	1.08031	1.06548	1.41373	1.39243	1.28306	1.03111	0.963829	1.24622	1.08451	1.15531	1.75185	1.17733	1.07521	1.07753	1.3598
12											0.901092	0.226674	0.221181	1.03969	0.114784	0.393568	0.249388	0.320174	0.80998	0.745697	0.414473	0.838619	0.618233	0.936708	0.66843	0.554321	0.843005	0.800521	0.993355	0.718919	1.50188	1.40065	1.00099	1.45367	1.30387	1.27624	0.894395	0.897158	0.822801	1.19834	1.08822	0.844825	1.19511	1.28406	1.3424	1.30231	1.18666	1.14674	1.05463
13												0.88283	0.678268	0.432047	0.845707	0.866445	0.622101	0.755061	0.234531	1.04245	0.148822	0.50487	0.880388	0.450625	0.827425	0.68969	0.375915	0.0901324	0.445561	0.748801	0.217749	0.237358	0.455462	0.223681	0.208886	0.2528	0.96518	0.941481	0.830173	0.271667	0.259934	0.784438	0.40195	0.445465	1.28369	0.463644	0.366577	0.416449	0.868944
14													0.302046	1.03209	0.110204	0.212729	0.278996	0.1657	0.797627	0.634223	0.355112	0.827864	0.519952	0.922798	0.583493	0.479147	0.826506	0.779454	0.977054	0.689128	1.48085	1.37906	0.979783	1.43205	1.28236	1.25452	0.821598	0.82915	0.76252	1.17553	1.06502	0.791643	1.17126	1.26025	1.28342	1.2782	1.16185	1.12071	1.00629
15														0.804889	0.190643	0.368544	0.0418798	0.261018	0.578983	0.66088	0.243178	0.602067	0.511389	0.7064	0.542966	0.412421	0.61529	0.580186	0.766409	0.496682	1.28263	1.18211	0.780319	1.23517	1.08516	1.05778	0.751367	0.746606	0.659775	0.981259	0.87148	0.670784	0.979252	1.06828	1.17838	1.08696	0.972272	0.933954	0.874356
16															0.989399	1.02848	0.760537	0.918414	0.256936	1.22577	0.567682	0.622351	1.06486	0.616321	1.03091	0.892684	0.595961	0.527131	0.6848	0.92841	1.16715	1.0815	0.785261	1.13668	0.988971	0.968592	1.18567	1.16569	1.05749	0.919777	0.832226	1.02537	0.95126	1.03167	1.53396	1.05419	0.950349	0.939593	1.15319
17																0.293566	0.156617	0.182821	0.757142	0.663614	0.335866	0.785903	0.53398	0.882911	0.590273	0.476332	0.787889	0.743673	0.938522	0.653872	1.44526	1.34377	0.943931	1.39679	1.24702	1.21929	0.819751	0.823461	0.750744	1.14091	1.03057	0.775141	1.13719	1.22619	1.27176	1.24432	1.12838	1.08793	0.987417
24																	0.328516	0.127715	0.788491	0.491879	0.29514	0.821112	0.384309	0.912023	0.476075	0.385617	0.812714	0.75979	0.963362	0.663549	1.46117	1.35868	0.960167	1.41165	1.2621	1.23401	0.73328	0.747549	0.692154	1.15369	1.04272	0.731068	1.14816	1.23717	1.21425	1.25475	1.13753	1.09488	0.951539
25																		0.20422	0.526442	0.612022	0.164769	0.544251	0.455246	0.649829	0.484933	0.347926	0.554934	0.519759	0.708355	0.390611	1.22433	1.12342	0.718275	1.17641	1.02635	0.998778	0.69076	0.6841	0.593583	0.921475	0.811037	0.603063	0.918502	1.00781	1.11497	1.02639	0.91142	0.872351	0.809467
36																			0.677281	0.477347	0.0821577	0.708931	0.296464	0.800182	0.398945	0.267251	0.700274	0.647681	0.851388	0.535938	1.34966	1.24715	0.847669	1.3001	1.15052	1.1224	0.644227	0.650294	0.58356	1.04202	0.93092	0.620162	1.03637	1.12546	1.11324	1.14306	1.02587	0.983192	0.844586
61																				0.977607	0.279494	0.314462	0.815655	0.0894768	0.775228	0.636108	0.199498	0.135508	0.184991	0.672416	0.892524	0.803363	0.432847	0.85671	0.702998	0.679615	0.924708	0.903206	0.792813	0.626214	0.525473	0.75587	0.647469	0.734885	1.26472	0.759398	0.657627	0.643757	0.875515
84																					0.486628	1.01647	0.429687	1.09943	0.37276	0.439449	0.995642	0.930949	1.14565	0.851801	1.63143	1.5277	1.13245	1.58062	1.43141	1.40289	0.716655	0.767343	0.761184	1.32019	1.20864	0.822879	1.31257	1.40144	1.26587	1.41828	1.29934	1.2539	1.0449
85																						0.389868	0.288482	0.414288	0.278442	0.0808355	0.297513	0.0541619	0.42125	0.183676	0.723409	0.606713	0.348913	0.656164	0.497995	0.458516	0.443315	0.409708	0.221588	0.336086	0.100063	0.126599	0.186107	0.371462	0.804834	0.401454	0.29705	0.209229	0.40852
89																							0.853831	0.380837	0.820527	0.679522	0.318946	0.393363	0.504975	0.692761	1.13055	1.03467	0.598006	1.08763	0.935222	0.909155	0.977141	0.956808	0.846481	0.842013	0.732793	0.815165	0.847716	0.938179	1.33063	0.960249	0.852717	0.825743	0.957672
90																								0.936932	0.31188	0.133569	0.832558	0.768195	0.982994	0.675866	1.46936	1.36563	0.96927	1.41854	1.26928	1.24074	0.618513	0.636631	0.59882	1.15803	1.04633	0.659887	1.1503	1.23928	1.12996	1.25616	1.13732	1.09192	0.893614
91																									0.895812	0.755847	0.204807	0.305502	0.319694	0.787219	1.08484	0.991147	0.548094	1.04389	0.88966	0.864079	1.04524	1.02347	0.912182	0.801856	0.692745	0.874932	0.811781	0.90293	1.38612	0.926776	0.822763	0.801509	0.998945
92																										0.1086	0.787932	0.711371	0.937164	0.656098	1.41106	1.30613	0.914481	1.35901	1.21014	1.1812	0.3103	0.354597	0.424373	1.09619	0.984122	0.518266	1.08656	1.17527	0.921528	1.19136	1.07071	1.02252	0.743942
93																											0.647281	0.572664	0.79744	0.492478	1.274	1.16922	0.774659	1.22207	1.07306	1.04413	0.362427	0.331886	0.257826	0.959363	0.846995	0.368455	0.949714	1.0387	0.865035	1.05498	0.934756	0.886977	0.642585
94																												0.105874	0.202678	0.679021	0.997948	0.901241	0.365092	0.953431	0.798165	0.770845	0.934702	0.912072	0.7993	0.702544	0.585403	0.759335	0.703366	0.798496	1.27178	0.82245	0.717726	0.691691	0.881158
95																													0.189759	0.632803	0.755727	0.65659	0.168971	0.706372	0.541672	0.509847	0.846337	0.821587	0.70821	0.43505	0.276918	0.658887	0.407205	0.525936	1.16106	0.556825	0.461081	0.432472	0.743147
96																														0.836707	1.07835	0.983992	0.500655	1.03615	0.879728	0.853203	1.08242	1.05974	0.947645	0.790226	0.675693	0.906896	0.797016	0.891261	1.41615	0.916397	0.814235	0.793606	1.02109
97																															1.34274	1.24011	0.827273	1.29293	1.14287	1.11454	0.832218	0.81252	0.696314	1.03389	0.921176	0.687391	1.02707	1.11721	1.22661	1.13524	1.01881	0.976425	0.904255
98																																0.40168	1.0657	0.573312	0.705764	0.738433	1.54391	1.51941	1.4081	0.738136	0.83322	1.35921	0.928845	0.909442	1.85351	0.903846	0.773812	0.86663	1.42849
99																																	0.964515	0.391563	0.60555	0.632989	1.43784	1.41315	1.30182	0.611371	0.71981	1.25215	0.807681	0.773644	1.74529	0.757577	0.610287	0.72215	1.31765
100																																		1.0156	0.857601	0.82718	1.05217	1.02765	0.913416	0.74942	0.614802	0.86577	0.733419	0.838063	1.37349	0.863746	0.760602	0.729404	0.965372
101																																			0.605253	0.644768	1.49072	1.46601	1.35465	0.63679	0.763235	1.30494	0.85209	0.815328	1.79818	0.805043	0.676206	0.780096	1.37061
102																																				0.123762	1.34229	1.31762	1.20611	0.366118	0.577938	1.15659	0.680095	0.654859	1.65071	0.678033	0.600092	0.668751	1.22445
103																																					1.313	1.28825	1.17669	0.144788	0.525836	1.12687	0.629538	0.600352	1.62081	0.637268	0.575008	0.636682	1.19384
104																																						0.311097	0.523412	1.22583	1.11367	0.608025	1.2146	1.30288	0.827056	1.31815	1.19564	1.14476	0.767041
105																																							0.438835	1.20071	1.08839	0.547951	1.18911	1.27742	0.858478	1.29259	1.16987	1.11858	0.742404
106																																								1.08907	0.976226	0.314906	1.07706	1.16574	0.92175	1.18107	1.05866	1.0075	0.690683
107																																									0.397276	1.03773	0.462914	0.315915	1.52962	0.426632	0.428307	0.487499	1.09779
108																																										0.924367	0.210711	0.475632	1.41775	0.545806	0.493209	0.483497	0.986798
109																																											1.02427	1.11298	0.933508	1.1279	1.00452	0.951647	0.637551
110																																												0.479207	1.51571	0.572732	0.540143	0.526851	1.08102
111																																													1.60283	0.383978	0.467164	0.502919	1.16637
112																																														1.61639	1.49001	1.43387	0.804482
113																																															0.358852	0.437249	1.17767
114																																																0.19867	1.04615
115																																																	0.983388
116
117
118
119
120
121
122
123
124
125
126
127
128
129
130
131
132
133
134
[truncated: 18 more columns]
